# Supplementary material for: Flip-Flop HSV-BAC: bacterial artificial chromosome based system for rapid generation of recombinant herpes simplex virus vectors using two independent site-specific recombinases
Source: PubMed Central journal article supplement (PMC1609115; doi:10.1186/1472-6750-6-40), 2006-09-22

**a**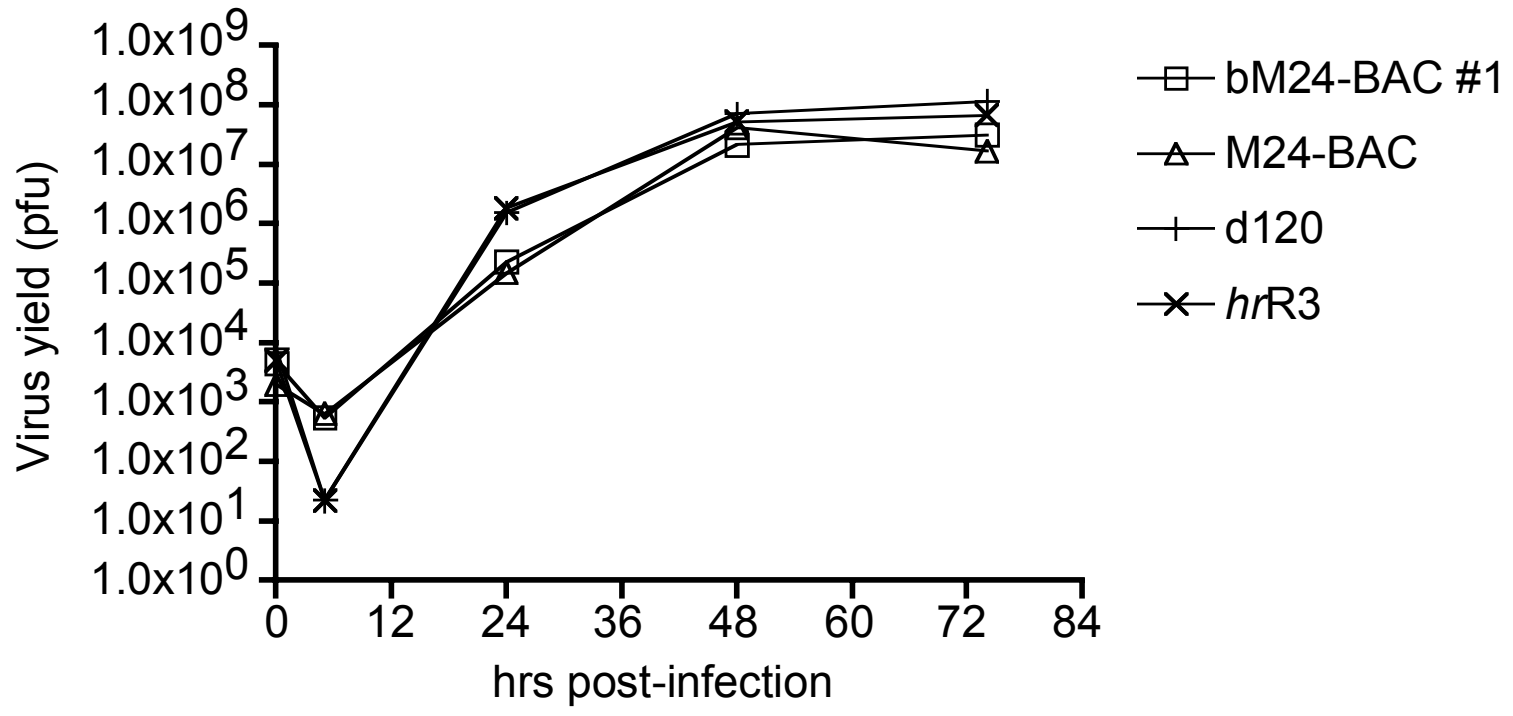**b**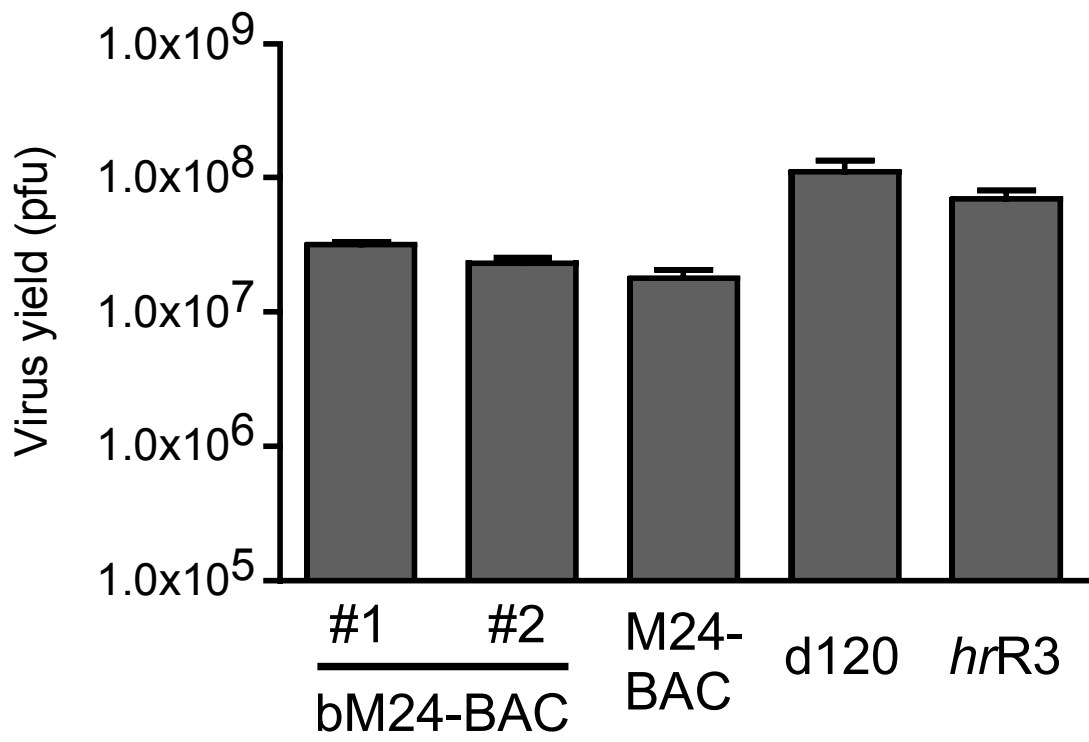

Supplement: 1472-6750-6-40-S2.pdf [file 1472-6750-6-40-S2.pdf]
