# Supplementary material for: Flip-Flop HSV-BAC: bacterial artificial chromosome based system for rapid generation of recombinant herpes simplex virus vectors using two independent site-specific recombinases
Source: PubMed Central journal article supplement (PMC1609115; doi:10.1186/1472-6750-6-40), 2006-09-22
Supplement: 1472-6750-6-40-S3.pdf [file 1472-6750-6-40-S3.pdf]

|                                 |                                                                                                                                                |                                                                                         |
|---------------------------------|------------------------------------------------------------------------------------------------------------------------------------------------|-----------------------------------------------------------------------------------------|
| Parental virus                  | d120 (Virus)                                                                                                                                   |                                                                                         |
| Prototype recombinant virus/BAC | M24-BAC (Prototype virus)<br>pM24-BAC (Prototype HSV-BAC)<br>bM24-BAC (Reconstituted virus)                                                    |                                                                                         |
| CMV-promoter virus/BAC          | pM24-BAC-CMV (Integrated HSV-BAC-shuttle)<br><br>doubly-inserted pM24-BAC-CMV (Integrated HSV-BAC-shuttle)<br><br>bM24-CMV (Recombinant virus) | <p style="text-align: center;">HindIII fragment observed in multiple-insert clones.</p> |
| No-promoter virus/BAC           | pM24-BAC-null (Integrated HSV-BAC-shuttle)<br><br>bM24-null (Recombinant virus)                                                                |                                                                                         |
| No-ICP4 virus/BAC               | pM24-BAC-empty (Integrated HSV-BAC-shuttle)<br><br>bM24-empty (Recombinant virus)                                                              |                                                                                         |
